# Supplementary material
Source: PubMed Central journal article supplement (PMC9932456)
Supplement: mmc1.pdf [file mmc1.pdf]

## Appendices

Appendix A. Search Strategy

Appendix B. Technical details for data extraction and synthesis

Appendix C. Supplemental tables and figures

## Appendix A. Search Strategy

MEDLINE via PubMed

```
(((((depress*[Text Word] OR "mental distress"[Text Word] OR "psychological distress"[Text Word] OR "depression"[MeSH]) AND (("COVID-19" OR "COVID-19"[MeSH Terms] OR covid OR "covid 19"[All Fields] OR "covid 19"[MeSH Terms] OR covid-19 OR "sars cov 2"[All Fields] OR "sars cov 2"[MeSH Terms] OR "severe acute respiratory syndrome coronavirus 2"[All Fields] OR "ncov"[All Fields] OR "2019 ncov"[All Fields] OR "coronavirus"[MeSH Terms] OR "coronavirus"[All Fields] OR "cov"[All Fields] OR "SARS-CoV-2"[All Fields] OR "2019-nCoV"[All Fields]))) AND (humans[Filter])) AND (english[Filter])) NOT (("canada"[MeSH Terms] OR "mexico"[MeSH Terms] OR "caribbean region"[MeSH Terms] OR "central america"[MeSH Terms] OR "latin america"[MeSH Terms] OR "south america"[MeSH Terms] OR "africa"[MeSH Terms] OR "asia"[MeSH Terms] OR "australia"[MeSH Terms] OR "europe"[MeSH Terms] OR "oceania"[MeSH Terms] OR "pacific islands"[MeSH Terms]) NOT (Hawaii OR "indian ocean islands"[MeSH Terms] NOT "United States"[MeSH]))
```

Filters: from 2019 - 2022

Embase search:

```
#1 'depression'/exp OR depression  
#2 depression OR depressive OR 'psychological distress' OR depress* OR 'common mood disorder' OR 'psychiatric diagnosis'  
#3 #1 OR #2  
#4 'coronavirus disease 2019'  
#5 'severe acute respiratory syndrome coronavirus 2'  
#6 2019 AND ncov  
#7 covid  
#8 #4 OR #5 OR #6 OR #7  
#9 #3 AND #8  
#10 #3 AND #8 AND ([article]/lim OR [article in press]/lim) AND [humans]/lim AND [english]/lim  
#11 'united states'/exp OR 'united states'  
#12 #10 AND #11
```

Combined

Cochrane library

```
#1 MeSH descriptor: [Depression] explode all trees  
#2 depress* OR "psychological distress" OR "mental distress"  
#3 #1 or #2  
#4 MeSH descriptor: [COVID-19] explode all trees
```

#5 covid OR "covid 19" OR "sars cov 2" OR "severe acute respiratory syndrome coronavirus 2" OR "ncov" OR "2019 ncov" OR "coronavirus" OR "cov" OR "SARS-CoV-2" OR "2019-nCoV"

#6 #4 OR #5

#7 #3 AND #6

Selected the trials tab

APA PsycInfo

TX ( Depression OR depressive OR psychological distress OR depress\* OR mental distress )  
AND TX ( covid OR "covid 19" OR "sars cov 2" OR "severe acute respiratory syndrome coronavirus 2" OR "ncov" OR "2019 ncov" OR "coronavirus" OR "cov" OR "SARS-CoV-2" OR "2019 nCoV" )

Filters: Published within Jan 2019 – May 2022; Peer reviewed; Human population; English-speaking; adulthood (18 yrs & older)

## Appendix B. Technical details for data extraction and synthesis

### Manual calculations

For studies that did not report the prevalence of depression among all U.S. adults but that reported enough data for us to manually calculate it, we calculated the prevalence of depression. For studies that provided mild, moderate, and severe depression separately, we combined the moderate and severe prevalence numbers, weighted by sample size. A summary of the manual calculations is provided below.

Appendix B Table 1. Details for synchronizing severity levels

| Author (Year)               | Description                                                                                                                     |
|-----------------------------|---------------------------------------------------------------------------------------------------------------------------------|
| Breslau et al. (2022, 2021) | Combined the prevalence of moderate distress with the prevalence of severe distress                                             |
| Kantor and Kantor (2020)    | Combined the prevalence of moderate distress with the prevalence of severe distress                                             |
| Matzopoulos et al. (2022)   | Combined prevalence of depression for psychedelic and non-psychedelic users                                                     |
| Park et al. (2022)          | Divided the number of respondents who met the cutoff for depression over the total number of respondents                        |
| Thomeer et al. (2022)       | Extracted participants who screened positive for depression from a combined prevalence of depression and anxiety                |
| Twenge et al. (2021)        | Combined sample size from different data collection periods that were aggregated into seasonal waves                            |
| Wilson et al. (2021)        | Combined the prevalence of moderate depressive symptoms with the prevalence of moderately severe and severe depressive symptoms |
| Zhang et al. (2021)         | Combined the prevalence of depression in women with the prevalence of depression in men                                         |
| Zhou et al. (2020)          | Combined the prevalence of moderate depressive symptoms with the prevalence of severe and extremely severe depressive symptoms  |

Note: \*Same data point reported in two articles

### Details on data extraction

In cases when articles did not state the last date of data collection, but when they stated the last month, we entered in the last day of the month (Breslau et al., 2021; Lee et al., 2021; Lueck, 2021; Matzopoulos et al., 2022; Shi et al., 2022). For depression instrument cutoffs, Zhou et al did not note their cutoff so we assumed a standard cutoff score of 14 or greater for the DASS-21 (Antony et al., 1998). For Lee et al., we reported a standard cutoff of three on the PHQ-1 (the second question of PHQ-2) based on information provided by authors.

## Details on depression instruments used in articles included in review

**PHQ:** The PHQ (Patient Health Questionnaire) was the most frequently used depression instrument and was used in 73.4% of studies in the literature reviewed (n=36). Within the broad categorization of PHQ, studies used different versions of the screening tool: the PHQ-2, PHQ-4, PHQ-8, PHQ-9, and the PHQ-1 (using a single item, the second question of the PHQ-9).

- **PHQ-9 (n=5):** The PHQ-9 is the 9-item depression screening instrument from the full PHQ. The PHQ-9 has been clinically validated and can be used to screen for major depressive disorder with varying severities: total scores of 5, 10, 15, and 20 represent cut points for mild, moderate, moderately severe, and severe depression respectively (Kroenke et al., 2001). Of the 5 studies that used the PHQ-9, 4 used a cutoff score of 10, indicating moderate depressive symptoms or above (Ettman et al., 2021, 2020; Kantor and Kantor, 2020; Matzopoulos et al., 2022). One study, by Bryan et al., used a cutoff score of 14, indicating severe depressive symptoms or above ("greater than or equal to 14") (Bryan et al., 2020).
- **PHQ-8 (n=4):** The PHQ-8 includes the same questions as the PHQ-9 (excluding the 9th item on self-harm). The PHQ-8 also uses the same cutoff points as the PHQ-9: total scores of 5, 10, 15, and 20 represent cut points for mild, moderate, moderately severe, and severe depression respectively (Kroenke et al., 2009). All 4 studies that used the PHQ-8 used the same severity cutoff (cutoff score  $\geq 10$ ), reporting on moderate depressive symptoms or above (MacDonald et al., 2022; McKnight-Eily et al., 2021; Warren et al., 2021; Wilson et al., 2021).
- **PHQ-4 (n=5):** The PHQ-4 is a validated screening tool for depression *and* anxiety (combining the PHQ-2 and GAD-2) (Kroenke et al., 2009, 2003). A score of  $\geq 3$  represents a cutoff for identifying potential cases of depression. There was considerable heterogeneity in the manner that authors reported their results when using the PHQ-4. For our analysis, we categorized the literature into two categories. First, studies that did report the usage of the PHQ-2 and GAD-2 (but not PHQ-4 specifically) were grouped as PHQ-4 studies for consistency. The three studies that fit these criteria do not report disaggregated results for depression or anxiety; however, use a depression screener cutoff of " $\geq 3$  on either the GAD-2 or PHQ-2," assessing symptoms that are mild and above (Cai et al., 2021; Czeisler et al., 2021b; Nagata et al., 2022). Studies conducted by Kampfen et al. and Riehm et al. specify their usage of the PHQ-4 in particular - and use the associated screener cutoff ( $\geq 3$  on the PHQ-4) (Kämpfen et al., 2020; Riehm et al., 2021). Anxiety and depression were not disaggregated in these studies. Broadly, when a study did not report disaggregation between results for depression and anxiety, specifically for the PHQ category, we categorized them as PHQ-4.
- **PHQ-2 (n=21):** The PHQ-2 consists of the first 2 questions of the PHQ-9, and a cutoff score of  $\geq 3$  indicates that "major depressive disorder is likely" (Kroenke et al., 2003). Of the 21 studies that used the PHQ-2, 20 used this definition (Chen et al., 2022; Czeisler, 2020; Czeisler et al., 2021a; Daly et al., 2021; Donnelly and Farina, 2021; Holingue et

al., 2020; Kim, 2021; Lee et al., 2021; Martinez et al., 2022; Nguyen et al., 2022; Park et al., 2022; Park and Kim, 2021; Samuels et al., 2021; Shen et al., 2022; Sundermeir et al., 2021; Thomeer et al., 2022; Twenge et al., 2021; Twenge and Joiner, 2020b; Vahratian, 2021; Zhang et al., 2021). Shen et. al did not state the cutoff score used in their analysis of depressive symptoms (hence, marked "Did not state") (Shen et al., 2022).

- **PHQ-1 (n=1):** One study used only the second question of the PHQ-2 as a depression screening instrument, which we called the PHQ-1. The PHQ-1 is a modified version of the PHQ-9 to assess serious depression if the participant selected showing symptoms "nearly every day". Only one study, Lee et al., used this depression screener, and the prevalence, on average, was lower using this instrument than instruments with more items (Lee and Singh, 2021).

**CESD:** The CES-D (Center for Epidemiological Studies - Depression) is a 20-item self-report screening instrument for depression. In our systematic review, 3 studies used versions of the CESD to ascertain depression levels (n=3).

There are two versions of the CESD that were used in the assessed literature: the CES-D-8 and the CES-D-10.

- **CES-D-8 (n=1):** The CES-D-8 is an 8-item screening tool developed to screen depressive symptoms. Scores range from 0-24, where higher scores indicate a higher frequency of depressive complaints. Only one study, Birditt et. al, used this depression screener, using a score of  $\geq 16$  as a benchmark of "poor psychological well-being" (Birditt et al., 2021).
- **CES-D-10 (n=2):** The CES-D-10 is a 10-item self-report measure of depression, where on a scale of 0-30, a score of  $\geq 10$  is considered "depressed". Two included studies used this instrument, Rosenberg et al. and Weaver et al.: using this definition as an indicator of the presence of "significant depressive symptoms"(Rosenberg et al., 2021; Weaver et al., 2021).

**Kessler:** The Kessler Psychological Distress Scale is a questionnaire intended to measure non-specific psychological distress, based on questions about depression and anxiety symptoms (n=8). The studies in this systematic review all used the Kessler-6: a 6-item self-report measure of psychological distress. On a scale from 0-24, moderate distress is identified as a score of 8-12, and serious distress  $\geq 13$ . All studies except one used a cutoff score of  $\geq 13$ , while Linton et al. used a score of  $\geq 5$  to quantify "severe to moderate psychological distress" (Linton et al., 2021). All 8 studies that used the Kessler-6 reported on broad "psychological distress" as outcomes (Breslau et al., 2022, 2021; Linton et al., 2021; McGinty et al., 2022, 2020a, 2020b; Shi et al., 2022; Twenge and Joiner, 2020a).

**DASS:** The Depression Anxiety Stress Scale is a self-report instrument designed to measure related emotional states of depression, anxiety, and tension/stress. The DASS is the least-reported measure of depression used in this systematic review (n=1).

The study in this systematic review used the DASS-21: a shorter 21-item version of the original 42-item instrument.

- **DASS-21:** The DASS-21 is a shortened 21-item version of the original instrument (the 42-item DASS) that measures severity of symptoms common to both depression and anxiety. Each measured item (depression, anxiety, and stress) is scored separately, and each score is multiplied by 2, using the traditional DASS measurement criteria. For depression, severity ratings range from 0-9, 10-13, 14-20, 21-27, and  $\geq 28$  for normal, mild, moderate, severe, and extremely severe depression, respectively. The study that used this depression screener, Zhou et. al, analyzes “depression” and disaggregates by severity level by wave. We manually calculated prevalences for this study by summing moderate, severe, and extremely severe depressive symptoms prevalence for each wave. We analyzed only the depression data, not anxiety or stress (Zhou et al., 2020).

**Original (n=1):** We had one study that used modified or original criteria to identify depression and other associated outcomes. Tham et. al reported on “mental distress” using participant’s responses to the following questions: “In the past 7 days, how often have you: 1) felt nervous, anxious, or on edge; 2) felt depressed; 3) felt lonely; 4) felt hopeless about the future; 5) had physical reactions such as sweating, trouble breathing, nausea or a pounding heart when thinking about your experience with the coronavirus pandemic?” (Tham et al., 2021).

**Combination (n=1):** When a study reported on more constructs than depression and anxiety, we categorized it as a “combination” study. Birditt et al. reported on “poor psychological well-being” using three scales: the CES-D-1 (Center for Epidemiologic Studies Depression Scale, Beck-1 (Beck Anxiety Inventory), and the Kircanski rumination scale (Birditt et al., 2021). Using a combination of these three instruments, a higher score ( $\geq 16$  on a 0-24 scale) indicated a greater likelihood of poor psychological well-being (depression, anxiety, and rumination).

Appendix B Table 2. Poor mental health severity by screening instrument used and construct measured

| Screening instrument | Mild and above | Moderate and above | Severe and above | Did not state | Total | Construct measured by screeners                                      |
|----------------------|----------------|--------------------|------------------|---------------|-------|----------------------------------------------------------------------|
| PHQ                  | 7              | 48                 | 15               | 1             | 71    | Depressive symptoms                                                  |
| Kessler              |                | 1                  | 9                |               | 10    | Psychological distress                                               |
| DASS                 |                | 3                  |                  |               | 3     | Negative emotional states of depression, anxiety, and tension/stress |
| CESD                 | 2              |                    |                  |               | 2     | Depressive symptoms                                                  |
| Combination          | 1              |                    |                  |               | 1     | Depressive symptoms and poor psychological well-being combined       |
| Original             |                | 1                  |                  |               | 1     | Common mental disorders                                              |
| Total                | 10             | 53                 | 24               | 1             | 88    |                                                                      |



## Appendix C. Supplemental tables and figures

**Supplemental Figure 1.** Frequency of prevalence points collected by month of data collection and month of article publication (n=88)

**Supplemental Figure 2.** Frequency of prevalence points reported across time by depression screening tool core

**Supplemental Figure 3.** Frequency of prevalence points reported across time by depression screener and cutoff

**Supplemental Figure 4.** Prevalence of depression over time by study source with more than three prevalence points

**Supplemental Figure 5.** Prevalence of depression over time by survey sampling technique

**Supplemental Figure 6.** Prevalence of depression over time by constructs including and excluding anxiety

**Supplemental Figure 7.** Prevalence of depression over time by constructs including and excluding psychological distress

**Supplemental Figure 8.** Prevalence of depression over time by severity unweighted and weighted by study size

**Supplemental Figure 9.** Prevalence of depression across time

**Supplemental Table 1.** Depression term used by authors across papers (n=49)

**Supplemental Table 2.** Comparison of depression screener groups by construct, number of articles, and sample size

**Supplemental Table 3.** Average prevalence of depression, prevalence points reported, sample size, minimum, and maximum estimates by mild, moderate, and severe depression

**Supplemental Table 4.** Average monthly prevalence of depression over time by severity, weighted and unweighted by sample size

**Supplemental Table 5.** Average monthly prevalence of depression over time by severity, comparing total sample (non-probability and probability-based studies) and samples with only probability-based samples

**Supplemental Table 6.** Average monthly prevalence of depression over time by severity, comparing total sample (depression and depression or anxiety) and only studies reporting depression

**Supplemental Table 7.** Average monthly prevalence of depression over time by severity, comparing constructs including and excluding psychological distress

**Supplemental Table 8.** Charted Review (n=49)

**Supplemental Figure 1.** Frequency of prevalence points collected by month of data collection and month of article publication (n=88)

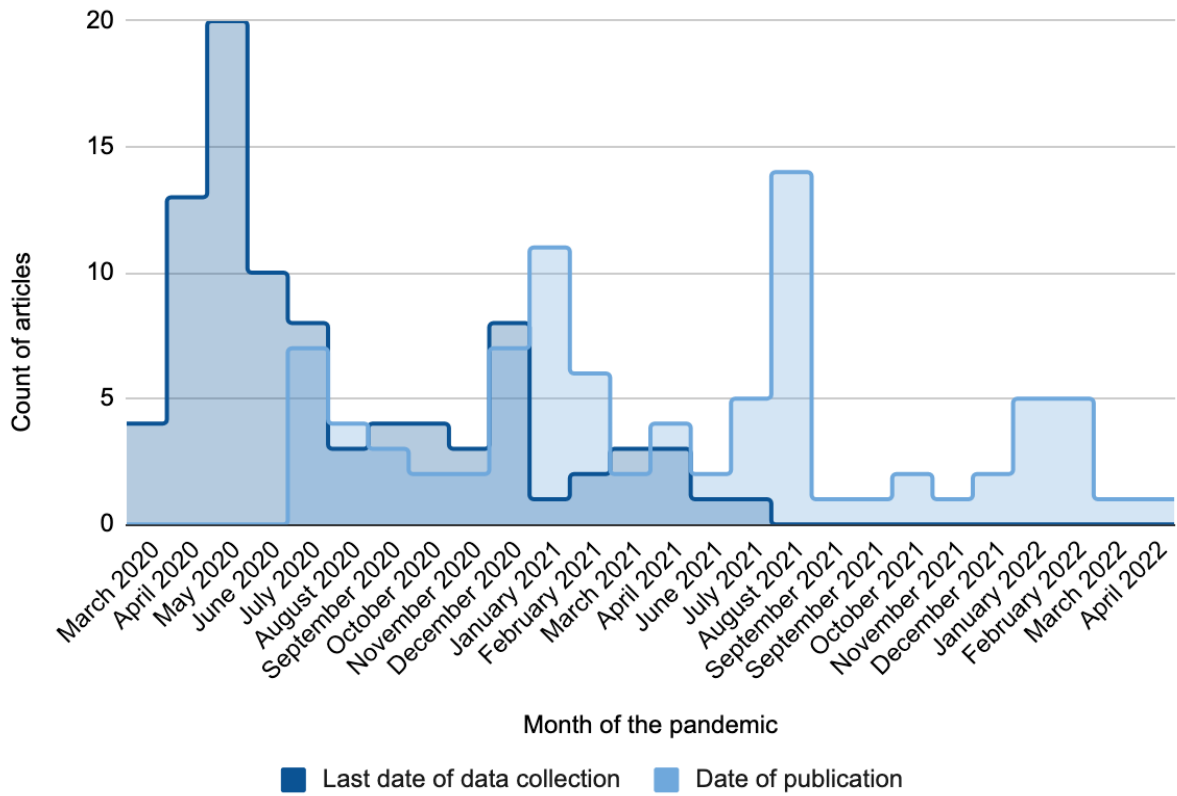

**Supplemental Figure 2.** Frequency of prevalence points reported across time by depression screening tool core.

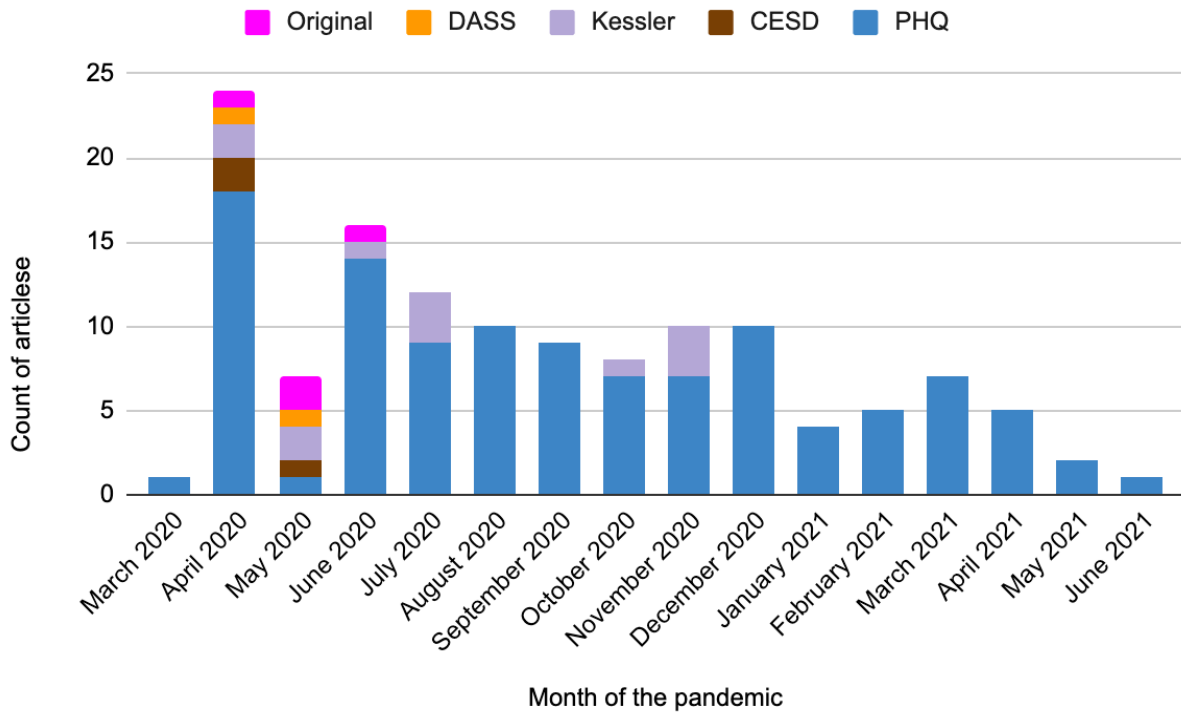

Note: Some studies reported pooled prevalence estimates collected across multiple months; numbers add up to more than 88. Not shown: one study used a combination of depression screeners in May 2020.

**Supplemental Figure 3.** Frequency of prevalence points reported across time by depression screener and cutoff.

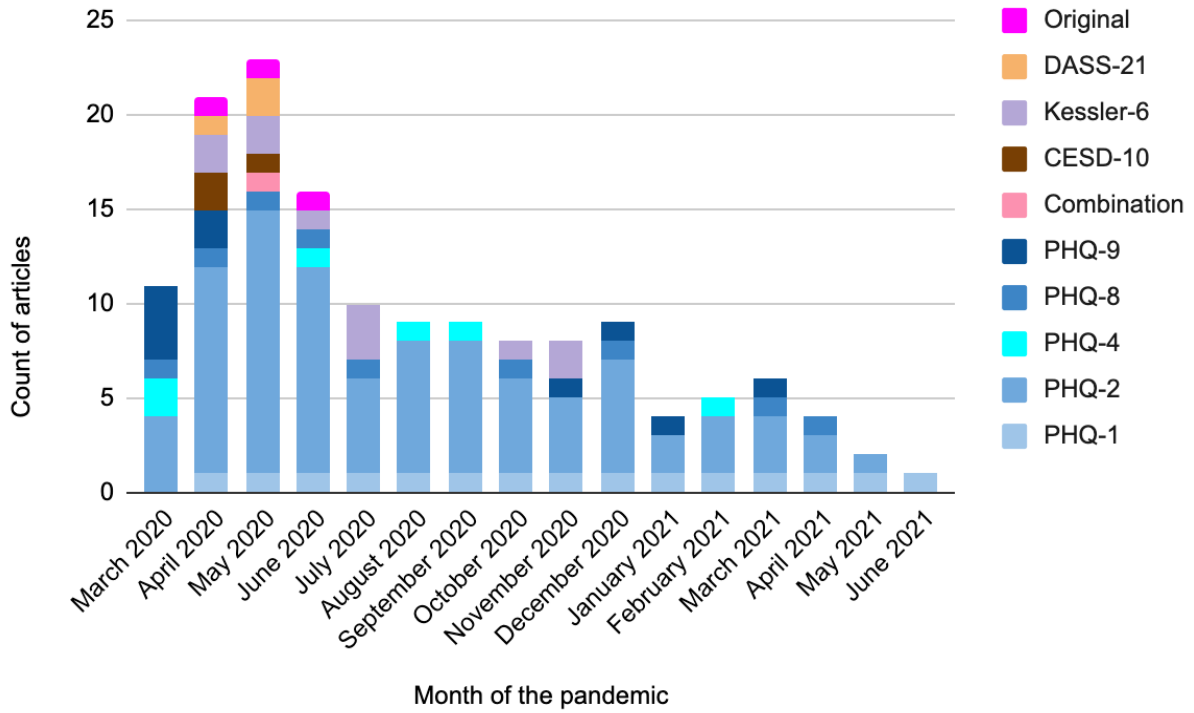

Note: Some studies reported pooled prevalence estimates collected across multiple months; numbers add up to more than 88.

Supplemental Figure 4. Prevalence of depression over time by study source with more than three prevalence points

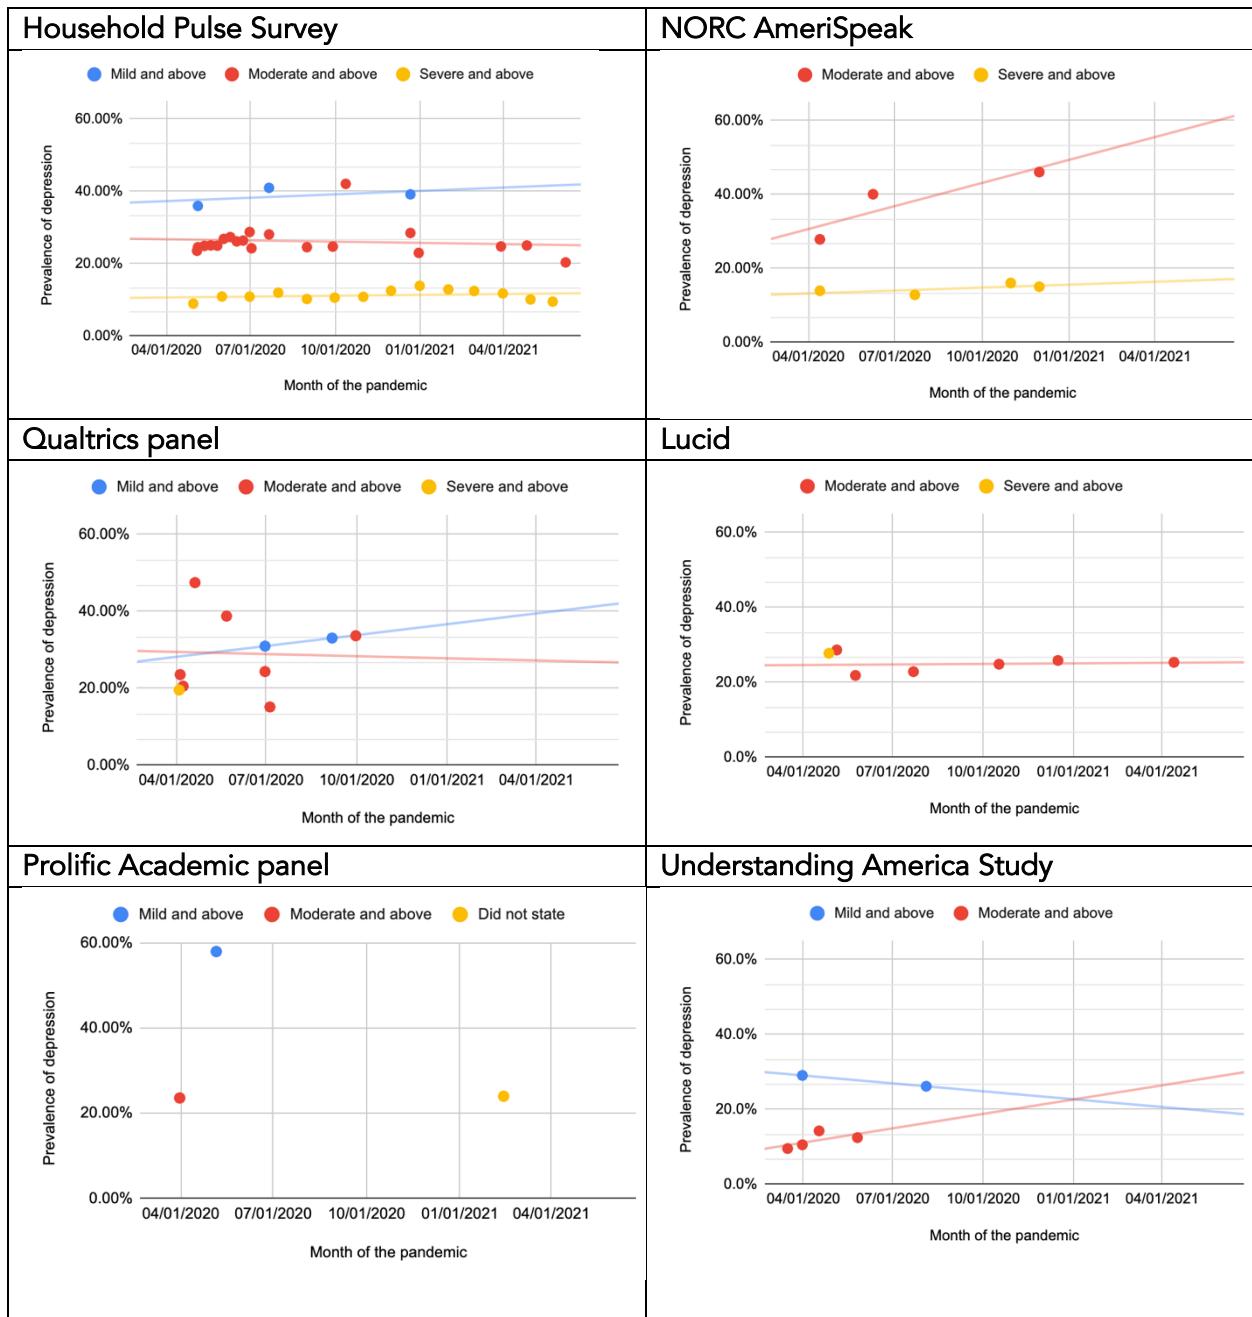

Note: Studies with only one prevalence point recorded not shown. Prevalence points are averaged by month.

Supplemental Figure 5. Prevalence of depression over time by survey sampling technique

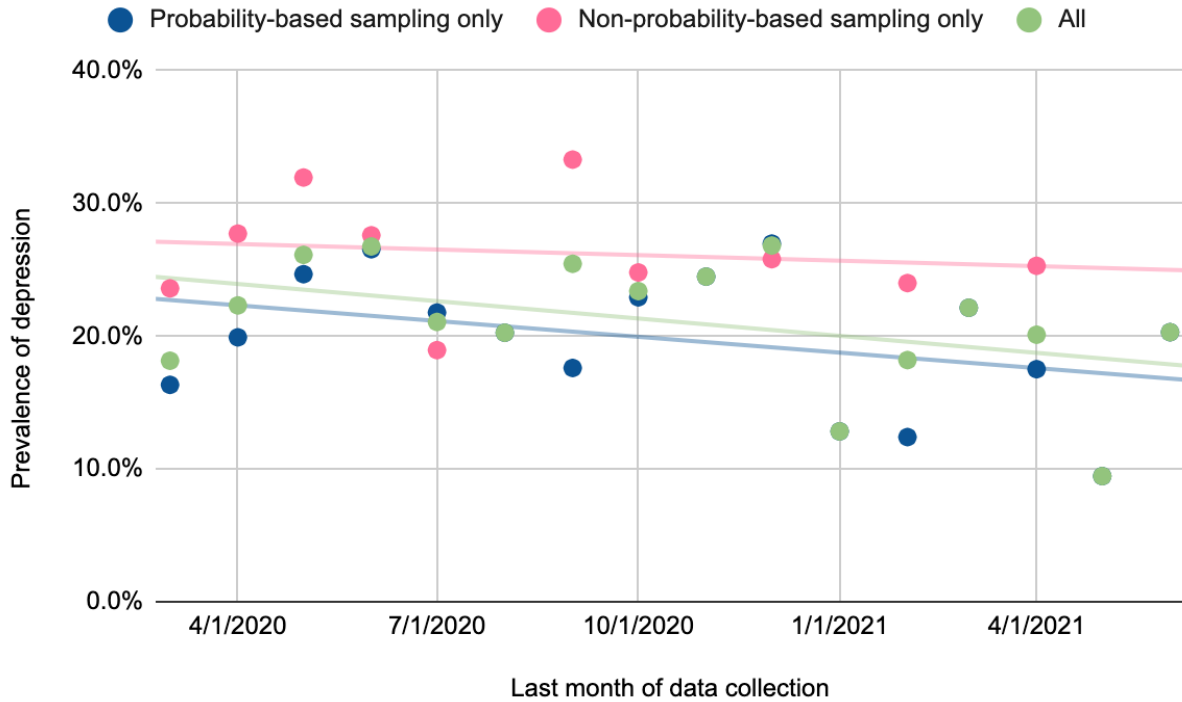

Supplemental Figure 6. Prevalence of depression over time by constructs including and excluding anxiety

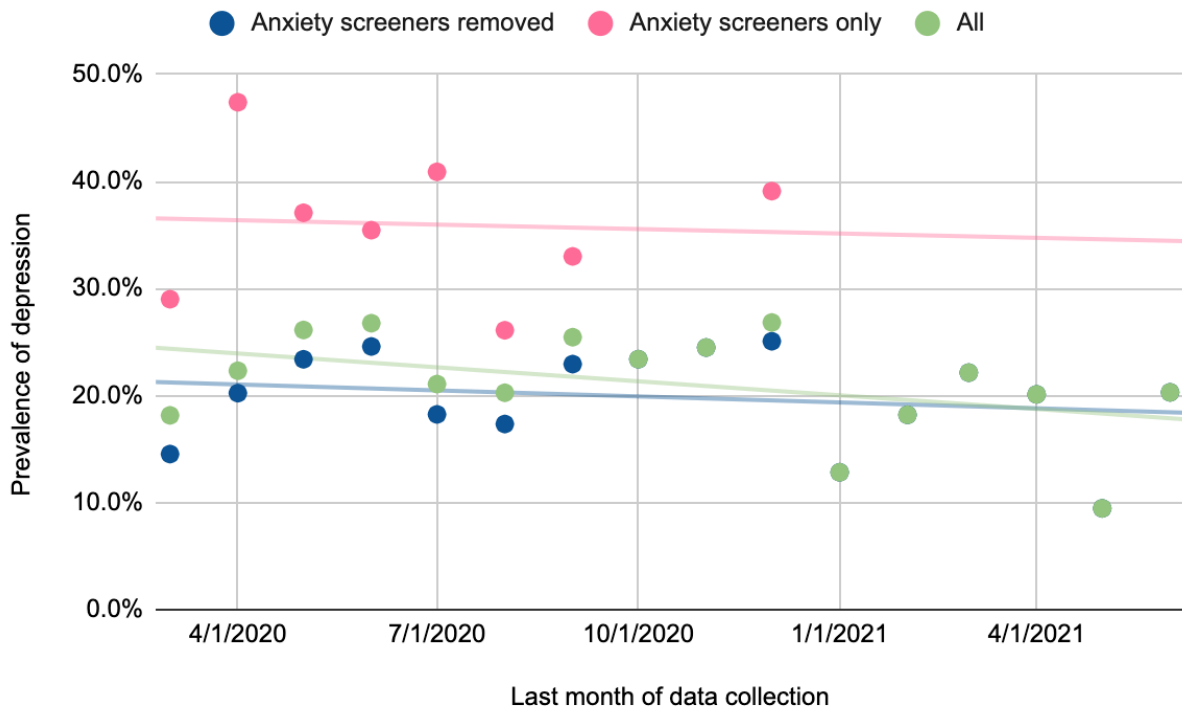

Supplemental Figure 7. Prevalence of depression over time by constructs including and excluding psychological distress

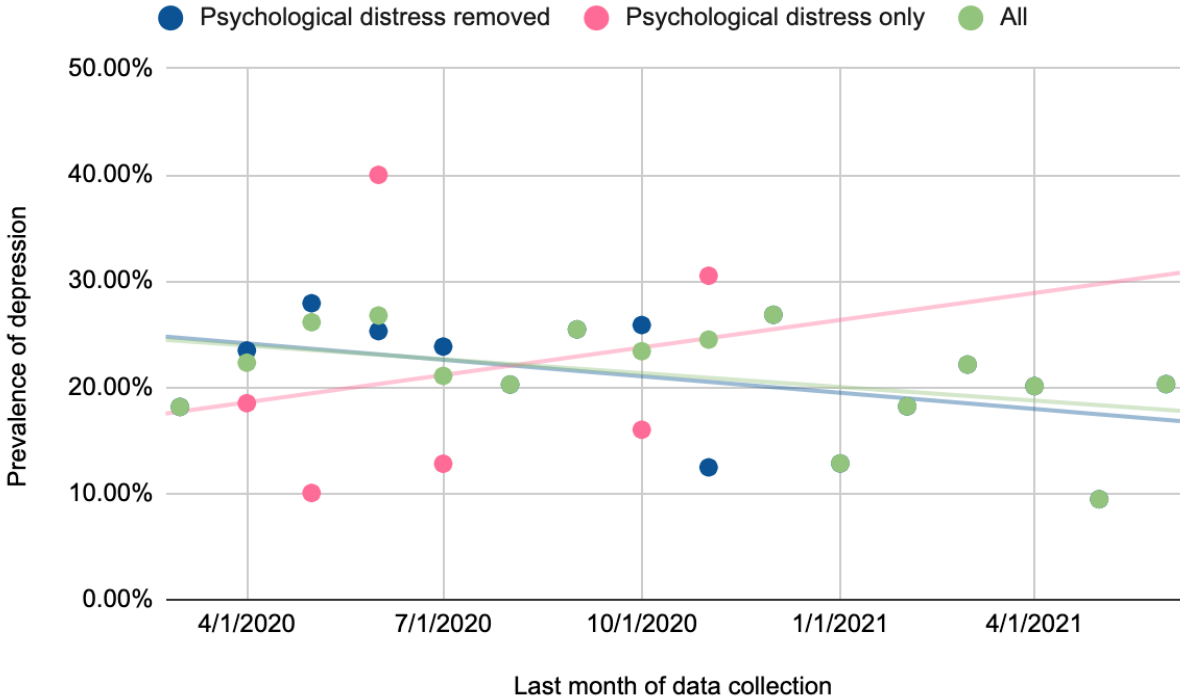

Supplemental Figure 8. Average prevalence of depression by month and by severity level, unweighted and weighted by study sample size

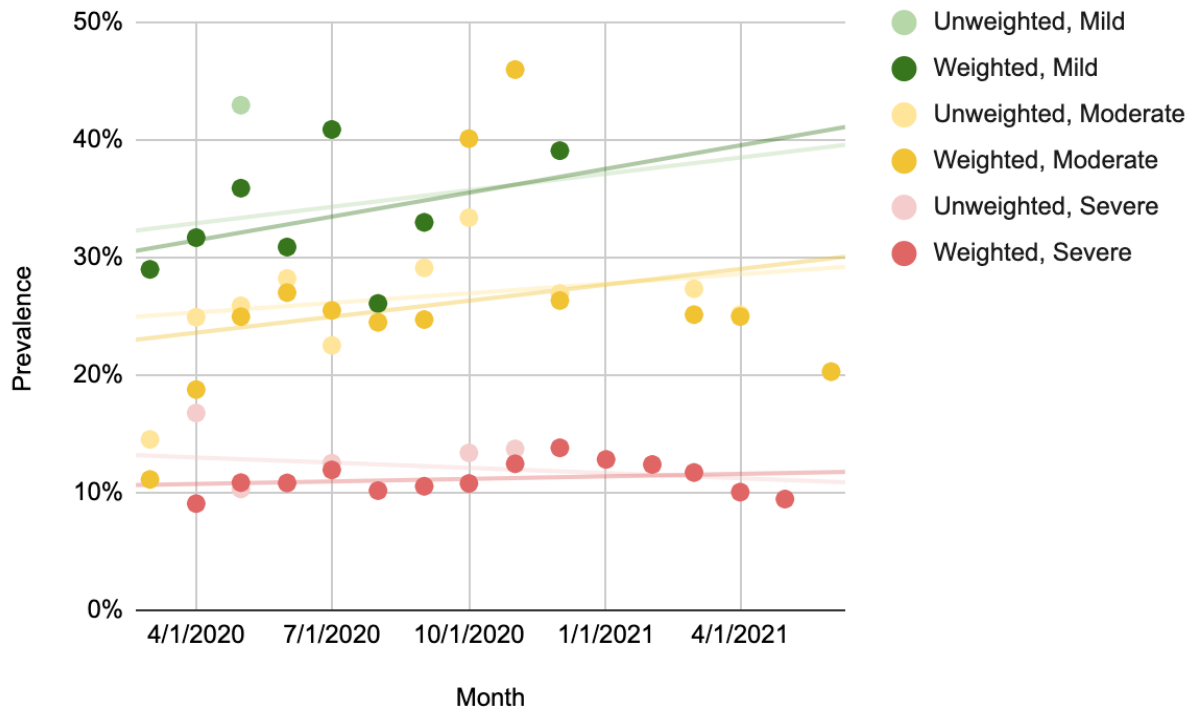



Supplemental Figure 9. Prevalence of depression across time

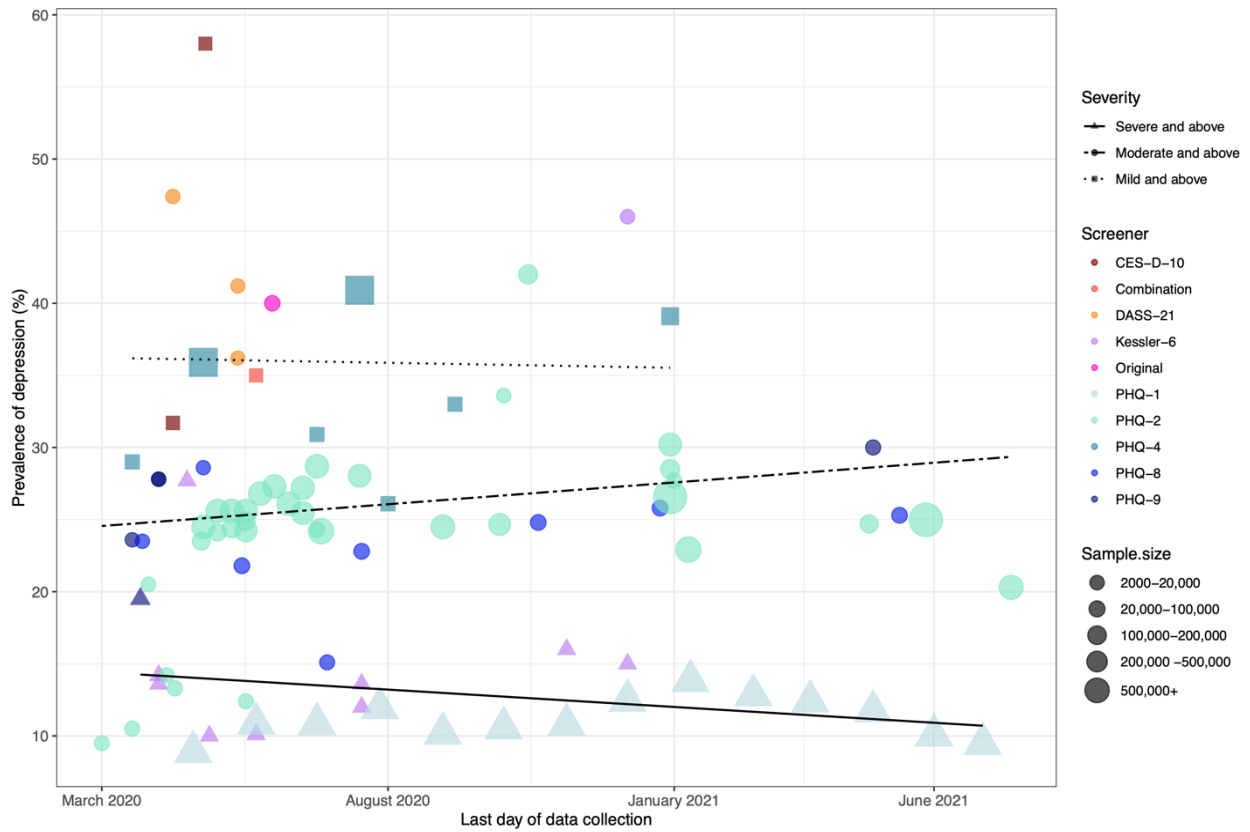

Note: Each symbol on the graph represents a prevalence point reported by papers, with different symbols showing the severity of depression reported: mild, moderate, severe. Best fit lines regressed against time by prevalence point stratified by severity. Larger symbols represent larger sample sizes for each prevalence point reported. Colors show depression instruments used.

**Supplemental Table 1.** Depression term used by authors across papers (n=49)

| <b>Depression terms used</b>       | <b>n (%)</b> |
|------------------------------------|--------------|
| Current depression                 | 1 (2%)       |
| Depression                         | 10 (20%)     |
| Depression and anxiety symptoms    | 1 (2%)       |
| Depression or anxiety              | 2 (4%)       |
| Depression symptoms                | 3 (6%)       |
| Depression/depressive disorder     | 1 (2%)       |
| Depressive and anxiety symptoms    | 1 (2%)       |
| Depressive disorder                | 1 (2%)       |
| Depressive disorder symptoms       | 1 (2%)       |
| Depressive symptoms                | 9 (18%)      |
| Depressive/anxiety symptoms        | 1 (2%)       |
| Major Depression Disorder (MDD)    | 1 (2%)       |
| Major depressive disorder symptoms | 1 (2%)       |
| Mental distress                    | 4 (8%)       |
| Poor psychological well-being      | 1 (2%)       |
| Probable depression                | 3 (6%)       |
| Psychological distress             | 7 (14%)      |
| Serious depression                 | 1 (2%)       |

**Supplemental Table 2.** Comparison of depression screener groups by construct, number of articles, and sample size

| Depression screener<br>(cutoff score)           | Severity level                                                                                                  | Number of articles | Total sample size |
|-------------------------------------------------|-----------------------------------------------------------------------------------------------------------------|--------------------|-------------------|
| PHQ-9, ( $\geq 10$ )                            | Moderate depressive symptoms or above                                                                           | 4                  | 11,026            |
| PHQ-9, ( $\geq 14$ )                            | Severe depressive symptoms or above                                                                             | 1                  | 10,625            |
| PHQ-8 ( $\geq 10$ )                             | Moderate depressive symptoms or above                                                                           | 4                  | 81,215            |
| PHQ-4 ( $\geq 3$ out of 12)                     | Depressive/anxiety symptoms                                                                                     | 2                  | 13,786            |
| PHQ-4 ( $\geq 3$ on PHQ-2 OR $\geq 3$ on GAD-2) | Positive screening for depression or anxiety                                                                    | 3                  | 1,069,579         |
| PHQ-2 ( $\geq 3$ )                              | Major depressive disorder is likely                                                                             | 20                 | 9,966,822         |
| PHQ-2 (Did not state)                           | Did not state                                                                                                   | 1                  | 503               |
| PHQ 1 ( $\geq 3$ )                              | Probable serious depression                                                                                     | 1                  | 986,692           |
| Kessler-6 ( $\geq 5$ )                          | Moderate to severe psychological distress                                                                       | 1                  |                   |
| Kessler-6 ( $\geq 13$ )                         | Psychological distress                                                                                          | 7                  | 15438             |
| CES-D-10 ( $\geq 10$ )                          | Significant depressive symptoms                                                                                 | 2                  | 1372              |
| DASS-21 ( $\geq 14$ )                           | Depressive symptoms                                                                                             | 1                  | 2096              |
| Combination                                     | "Higher score indicates higher likelihood of poor psychological well-being (depression, anxiety, or rumination" | 1                  | 645               |
| Original                                        | Moderate mental distress                                                                                        | 1                  | 11480             |

**Supplemental Table 3.** Average prevalence of depression, prevalence points reported, sample size, minimum, and maximum estimates by mild, moderate, and severe depression

| Severity      | Total number of prevalence points | Total sample size | Min   | Max   | Average |
|---------------|-----------------------------------|-------------------|-------|-------|---------|
| Mild          | 10                                | 2,073,731         | 26.1% | 58.0% | 36.0%   |
| Moderate      | 53                                | 11,383,806        | 9.5%  | 47.4% | 26.0%   |
| Severe        | 24                                | 13,838,529        | 8.9%  | 27.7% | 12.9%   |
| Did not state | 1                                 | 503               | 24.0% | 24.0% | 24.0%   |
| Total         | 88                                | 27,296,569        | 8.9%  | 58.0% | 23.5%   |

**Supplemental Table 4.** Average monthly prevalence of depression over time by severity, weighted and unweighted by sample size

| Month        | Prevalence points | Mild       |            | Moderate   |            | Severe     |            |
|--------------|-------------------|------------|------------|------------|------------|------------|------------|
|              |                   | Unweighted | Weighted   | Unweighted | Weighted   | Unweighted | Weighted   |
| 3/1/20       | 4                 | 29%        | 29%        | 15%        | 11%        |            |            |
| 4/1/20       | 13                | 32%        | 32%        | 25%        | 19%        | 17%        | 9%         |
| 5/1/20       | 20                | 43%        | 36%        | 26%        | 25%        | 10%        | 11%        |
| 6/1/20       | 10                | 31%        | 31%        | 28%        | 27%        | 11%        | 11%        |
| 7/1/20       | 8                 | 41%        | 41%        | 23%        | 26%        | 13%        | 12%        |
| 8/1/20       | 3                 | 26%        | 26%        | 25%        | 25%        | 10%        | 10%        |
| 9/1/20       | 4                 | 33%        | 33%        | 29%        | 25%        | 11%        | 11%        |
| 10/1/20      | 4                 |            |            | 33%        | 40%        | 13%        | 11%        |
| 11/1/20      | 3                 |            |            | 46%        | 46%        | 14%        | 12%        |
| 12/1/20      | 8                 | 39%        | 39%        | 27%        | 26%        | 14%        | 14%        |
| 1/1/21       | 1                 |            |            |            |            | 13%        | 13%        |
| 2/1/21       | 2                 |            |            |            |            | 12%        | 12%        |
| 3/1/21       | 3                 |            |            | 27%        | 25%        | 12%        | 12%        |
| 4/1/21       | 3                 |            |            | 25%        | 25%        | 10%        | 10%        |
| 5/1/21       | 1                 |            |            |            |            | 9%         | 9%         |
| 6/1/21       | 1                 |            |            | 20%        | 20%        |            |            |
| <b>Total</b> | <b>88</b>         | <b>34%</b> | <b>33%</b> | <b>26%</b> | <b>26%</b> | <b>12%</b> | <b>11%</b> |

**Supplemental Table 5.** Average monthly prevalence of depression over time by severity, comparing total sample (non-probability and probability-based studies) and samples with only probability-based samples

| Month        | Prevalence points<br>(non-probability sampling removed) | Mild         |                           | Moderate     |                           | Severe       |                           |
|--------------|---------------------------------------------------------|--------------|---------------------------|--------------|---------------------------|--------------|---------------------------|
|              |                                                         | All          | Probability sampling only | All          | Probability sampling only | All          | Probability sampling only |
| 3/1/20       | 3                                                       | 29.0%        | 29.0%                     | 14.5%        | 10.0%                     |              |                           |
| 4/1/20       | 9                                                       | 31.7%        | 31.7%                     | 24.9%        | 20.8%                     | 16.8%        | 16.1%                     |
| 5/1/20       | 16                                                      | 43.0%        | 43%                       | 25.9%        | 23.5%                     | 10.3%        | 10.3%                     |
| 6/1/20       | 8                                                       | 30.9%        |                           | 28.2%        | 28.8%                     | 10.8%        | 10.8%                     |
| 7/1/20       | 6                                                       | 40.9%        | 40.9%                     | 22.5%        | 26.1%                     | 13.0%        | 13.0%                     |
| 8/1/20       | 3                                                       | 26.1%        | 26.1%                     | 24.5%        | 24.5%                     | 10.2%        | 10.2%                     |
| 9/1/20       | 2                                                       | 33.0%        |                           | 29.1%        | 24.7%                     | 10.6%        | 10.6%                     |
| 10/1/20      | 3                                                       |              |                           | 33.4%        | 42.0%                     | 13.0%        | 13.0%                     |
| 11/1/20      | 3                                                       |              |                           | 46.0%        | 46%                       | 14.0%        | 14.0%                     |
| 12/1/20      | 7                                                       | 39.1%        | 39.1%                     | 27.0%        | 27.2%                     | 13.8%        | 13.8%                     |
| 1/1/21       | 1                                                       |              |                           |              |                           | 12.8%        | 12.8%                     |
| 2/1/21       | 1                                                       |              |                           |              |                           | 12.4%        | 12.4%                     |
| 3/1/21       | 3                                                       |              |                           | 27.4%        | 27.4%                     | 11.7%        | 11.7%                     |
| 4/1/21       | 2                                                       |              |                           | 25.1%        | 25.0%                     | 10.0%        | 10.0%                     |
| 5/1/21       | 1                                                       |              |                           |              |                           | 9.5%         | 9.5%                      |
| 6/1/21       | 1                                                       |              |                           | 20.3%        | 20.3%                     |              |                           |
| <b>Total</b> | <b>69</b>                                               | <b>36.0%</b> | <b>37.0%</b>              | <b>26.0%</b> | <b>25.4%</b>              | <b>12.9%</b> | <b>12.6%</b>              |

**Supplemental Table 6.** Average monthly prevalence of depression over time by severity, comparing total sample (depression and depression or anxiety) and only studies reporting depression

| Month   | Prevalence points<br>(anxiety removed) | Mild  |                           | Moderate |                           | Severe |                           |
|---------|----------------------------------------|-------|---------------------------|----------|---------------------------|--------|---------------------------|
|         |                                        | All   | Anxiety screeners removed | All      | Anxiety screeners removed | All    | Anxiety screeners removed |
| 3/1/20  | 3                                      | 29.0% |                           | 14.5%    | 14.5%                     |        |                           |
| 4/1/20  | 12                                     | 31.7% | 31.7%                     | 24.9%    | 21.2%                     | 16.8%  | 16.8%                     |
| 5/1/20  | 16                                     | 43.0% | 58.0%                     | 25.9%    | 23.8%                     | 10.3%  | 10.3%                     |
| 6/1/20  | 8                                      | 30.9% |                           | 28.2%    | 26.6%                     | 10.8%  | 10.8%                     |
| 7/1/20  | 7                                      | 40.9% |                           | 22.5%    | 22.5%                     | 13.0%  | 13.0%                     |
| 8/1/20  | 2                                      | 26.1% |                           | 24.5%    | 24.5%                     | 10.2%  | 10.2%                     |
| 9/1/20  | 3                                      | 33.0% |                           | 29.1%    | 29.1%                     | 10.6%  | 10.6%                     |
| 10/1/20 | 4                                      |       |                           | 33.4%    | 33.4%                     | 13.0%  | 13.0%                     |
| 11/1/20 | 3                                      |       |                           | 46.0%    | 46.0%                     | 14.0%  | 14.0%                     |
| 12/1/20 | 7                                      | 39.1% |                           | 27%      | 27.0%                     | 13.8%  | 13.8%                     |
| 1/1/21  | 1                                      |       |                           |          |                           | 12.8%  | 12.8%                     |
| 2/1/21  | 2                                      |       |                           |          |                           | 12.4%  | 12.4%                     |
| 3/1/21  | 3                                      |       |                           | 27.4%    | 27.4%                     | 11.7%  | 11.7%                     |
| 4/1/21  | 3                                      |       |                           | 25.1%    | 25.1%                     | 10.0%  | 10.0%                     |
| 5/1/21  | 1                                      |       |                           |          |                           | 9.5%   | 9.5%                      |
| 6/1/21  | 1                                      |       |                           | 20.3%    | 20.3%                     |        |                           |
| Total   | 76                                     | 36.0% | 44.9%                     | 26.0%    | 24.8%                     | 12.9%  | 12.9%                     |

**Supplemental Table 7.** Average monthly prevalence of depression over time by severity, comparing constructs including and excluding psychological distress

| Month        | Prevalence points<br>(psychological distress removed) | Mild         |                                          | Moderate     |                                          | Severe       |                                          |
|--------------|-------------------------------------------------------|--------------|------------------------------------------|--------------|------------------------------------------|--------------|------------------------------------------|
|              |                                                       | All          | Psychological distress screeners removed | All          | Psychological distress screeners removed | All          | Psychological distress screeners removed |
| 3/1/20       | 4                                                     | 29.0%        | 29.0%                                    | 14.5%        | 14.5%                                    |              |                                          |
| 4/1/20       | 10                                                    | 31.7%        | 31.7%                                    | 24.9%        | 24.9%                                    | 16.8%        | 14.2%                                    |
| 5/1/20       | 18                                                    | 43.0%        | 43.0%                                    | 25.9%        | 25.9%                                    | 10.3%        | 10.9%                                    |
| 6/1/20       | 9                                                     | 30.9%        | 30.9%                                    | 28.2%        | 26.6%                                    | 10.8%        | 10.8%                                    |
| 7/1/20       | 6                                                     | 40.9%        | 40.9%                                    | 22.5%        | 22.5%                                    | 12.5%        | 12.0%                                    |
| 8/1/20       | 3                                                     | 26.1%        | 26.1%                                    | 24.5%        | 24.5%                                    | 10.2%        | 10.2%                                    |
| 9/1/20       | 4                                                     | 33.0%        | 33.0%                                    | 29.1%        | 29.1%                                    | 10.6%        | 10.6%                                    |
| 10/1/20      | 3                                                     |              |                                          | 33.4%        | 33.4%                                    | 13.4%        | 10.8%                                    |
| 11/1/20      | 1                                                     |              |                                          | 46.0%        |                                          | 13.7%        | 12.5%                                    |
| 12/1/20      | 8                                                     | 39.1%        | 39.1%                                    | 27.0%        | 27.0%                                    | 13.8%        | 13.8%                                    |
| 1/1/21       | 1                                                     |              |                                          |              |                                          | 12.8%        | 12.8%                                    |
| 2/1/21       | 2                                                     |              |                                          |              |                                          | 12.4%        | 12.4%                                    |
| 3/1/21       | 3                                                     |              |                                          | 27.4%        | 27.4%                                    | 11.7%        | 11.7%                                    |
| 4/1/21       | 3                                                     |              |                                          | 25.1%        | 25.1%                                    | 10.0%        | 10.0%                                    |
| 5/1/21       | 1                                                     |              |                                          |              |                                          | 9.5%         | 9.5%                                     |
| 6/1/21       | 1                                                     |              |                                          | 20.3%        | 20.3%                                    |              |                                          |
| <b>Total</b> | <b>77</b>                                             | <b>36.0%</b> | <b>36.0%</b>                             | <b>26.0%</b> | <b>25.4%</b>                             | <b>12.9%</b> | <b>11.8%</b>                             |



**Supplemental Table 8.** Charted Review (n=49)

| First author last name (Year) | Pandemic data source | Sample size          | Depression term, as defined by articles | Depression screener (cutoff score)                           | Severity level     | More than depression?           | Days between last day of data collection and date published | Last date of data collection for paper | Prevalence of depression                  |
|-------------------------------|----------------------|----------------------|-----------------------------------------|--------------------------------------------------------------|--------------------|---------------------------------|-------------------------------------------------------------|----------------------------------------|-------------------------------------------|
| (Berkowitz and Basu, 2021)    | HPS                  | 122,133 <sup>◊</sup> | Depressive symptoms                     | PHQ-2 ( $\geq 3$ )                                           | Moderate and above | No                              | 129                                                         | October 12, 2020 <sup>α</sup>          | 42.0%                                     |
| (Birditt et al., 2021)        | Survey of Consumers  | 645 <sup>◊</sup>     | Poor psychological well-being           | Combination (CESD-1, Beck-1, and Kircanski rumination scale) | Mild and above     | Depression, anxiety, rumination | 190                                                         | May 31, 2020 <sup>β</sup>              | 35%                                       |
| (Breslau et al., 2021)        | ALP                  | 1,870 <sup>◊</sup>   | Psychological distress                  | Kessler-6 ( $\geq 13$ )                                      | Severe and above   | No                              | 214                                                         | May 31, 2020 <sup>α</sup>              | 10.1%                                     |
| (Breslau et al., 2022)        | ALP                  | 1,957 <sup>◊</sup>   | Psychological distress                  | Kessler-6 ( $\geq 13$ )                                      | Severe and above   | No                              | 448                                                         | May 8, 2020 <sup>β</sup>               | 10%                                       |
| (Bryan et al., 2020)          | Qualtrics panel      | 10,625 <sup>*</sup>  | Probable depression                     | PHQ-9 ( $\geq 14$ )                                          | Severe and above   | No                              | 111                                                         | April 4, 2020 <sup>β</sup>             | 19.50% <sup>ε</sup>                       |
| (Cai et al., 2021)            | HPS                  | 988,349 <sup>◊</sup> | Depression or anxiety                   | PHQ-4 ( $\geq 3$ on either the GAD-2 or PHQ-2)               | Mild and above     | Depression or anxiety           | 267                                                         | July 21, 2020 <sup>α</sup>             | April/May 2020: 35.9%<br>July 2020: 40.9% |
| (Chen et al., 2022)           | HPS                  | 453,167 <sup>◊</sup> | Depression                              | PHQ-2 ( $\geq 3$ )                                           | Moderate and above | No                              | 157                                                         | June 7, 2021 <sup>α</sup>              | 20.3%                                     |
| (Czeisler, 2020)              | Qualtrics panel      | 5,412 <sup>*</sup>   | Depression/depressive disorder          | PHQ-2 ( $\geq 3$ )                                           | Moderate and above | No                              | 45                                                          | June 30, 2020 <sup>β</sup>             | 24.3%                                     |

|                             |                         |                      |                                 |                                                |                    |                       |     |                                |                                        |
|-----------------------------|-------------------------|----------------------|---------------------------------|------------------------------------------------|--------------------|-----------------------|-----|--------------------------------|----------------------------------------|
| (Czeisler et al., 2021a)    | Qualtrics panel         | 3,010*               | Depressive disorder symptoms    | PHQ-2 ( $\geq 3$ )                             | Moderate and above | No                    | 341 | April 8, 2020 <sup>β</sup>     | 20.5%                                  |
| (Czeisler et al., 2021b)    | Qualtrics panel         | 5,470*               | Depression or anxiety           | PHQ-4 ( $\geq 3$ on either the GAD-2 or PHQ-2) | Mild and above     | Depression or anxiety | 166 | September 6, 2020 <sup>χ</sup> | 30.9%                                  |
| (Daly et al., 2021)         | UAS                     | 6819 <sup>◇</sup>    | Probable depression             | PHQ-2 ( $\geq 3$ )                             | Moderate and above | No                    | 168 | March 31, 2020 <sup>χ</sup>    | March 2020: 10.5%<br>April 2020: 14.2% |
| (Donnelly and Farina, 2021) | HPS                     | 582,440 <sup>◇</sup> | Depressive and anxiety symptoms | PHQ-2 ( $\geq 3$ )                             | Moderate and above | No                    | 150 | July 2, 2020 <sup>α</sup>      | 24.2%                                  |
| (Ettman et al., 2020)       | AmeriSpeak              | 1,441 <sup>◇</sup>   | Depression symptoms             | PHQ-9 ( $\geq 10$ )                            | Moderate and above | No                    | 142 | April 13, 2020 <sup>β</sup>    | 27.8%                                  |
| (Ettman et al., 2021)**     | AmeriSpeak              | 1,441 <sup>◇</sup>   | Probable depression             | PHQ-9 ( $\geq 10$ )                            | Moderate and above | No                    | 235 | April 13, 2020 <sup>β</sup>    | 27.8%                                  |
| (Holingue et al., 2020)     | UAS                     | 5,065 <sup>◇</sup>   | Mental distress                 | PHQ-2 ( $\geq 3$ )                             | Moderate and above | No                    | 205 | March 16, 2020 <sup>β</sup>    | 9.5%                                   |
| (Kämpfen et al., 2020)      | UAS                     | 6,885 <sup>◇</sup>   | Depressive/anxiety symptoms     | PHQ-4 ( $\geq 3$ )                             | Mild and above     | Depression or anxiety | 225 | March 31, 2020 <sup>β</sup>    | 29.0%                                  |
| (Kantor and Kantor, 2020)   | Prolific Academic panel | 1,005*               | Depression                      | PHQ-9 ( $\geq 10$ )                            | Moderate and above | No                    | 253 | March 31, 2020 <sup>β</sup>    | 23.6%                                  |

|                       |            |                      |                        |                        |                    |    |     |                                |                                                                                                                                                                                                                                                              |
|-----------------------|------------|----------------------|------------------------|------------------------|--------------------|----|-----|--------------------------------|--------------------------------------------------------------------------------------------------------------------------------------------------------------------------------------------------------------------------------------------------------------|
| (Kim, 2021)           | HPS        | 120,064 <sup>◊</sup> | Depression             | PHQ-2 ( $\geq 3$ )     | Moderate and above | No | 190 | December 21, 2020 <sup>α</sup> | 28.5%                                                                                                                                                                                                                                                        |
| (Lee and Singh, 2021) | HPS        | 986,692 <sup>◊</sup> | Serious depression     | PHQ-1 ( $\geq 3$ )     | Severe and above   | No | 72  | May 24, 2021 <sup>α</sup>      | April 2020: 8.91%, May 2020: 10.86%, June 2020: 10.83%, Jul 2020: 11.94%, Aug 2020: 10.18%, Sept 2020: 10.55%, Oct 2020: 10.78%, Nov 2020: 12.46%, Dec 2020: 13.82%, Jan 2021: 12.83%, Feb 2021: 12.40%, Mar 2021: 11.72%, Apr 2021: 10.05%, May 2021: 9.46% |
| (Lee et al., 2021)    | UAS        | 6,403 <sup>◊</sup>   | Depression             | PHQ-2 ( $\geq 3$ )     | Moderate and above | No | 500 | May 26, 2020 <sup>β</sup>      | 12.40%                                                                                                                                                                                                                                                       |
| (Linton et al., 2021) | AmeriSpeak | 1,222 <sup>◊</sup>   | Psychological distress | Kessler-6 ( $\geq 5$ ) | Moderate and above | No | 304 | November 30, 2020 <sup>β</sup> | 46%                                                                                                                                                                                                                                                          |

|                              |            |                     |                                 |                                |                    |                       |     |                                |                                                                                                                       |
|------------------------------|------------|---------------------|---------------------------------|--------------------------------|--------------------|-----------------------|-----|--------------------------------|-----------------------------------------------------------------------------------------------------------------------|
| (MacDonald et al., 2022)     | Lucid      | 14,636*             | Depressive symptoms             | PHQ-8 ( $\geq 10$ )            | Moderate and above | No                    | 303 | April 13, 2021 <sup>α</sup>    | May 2020: 21.8%, July 2020: 22.8%, October 2020: 24.8%, December 2020: 25.8%, March/April 2021: 25.3%, Overall: 24.1% |
| (Martinez et al., 2022)      | NAS        | 7,233 <sup>◇</sup>  | Depression and anxiety symptoms | PHQ-2 ( $\geq 3$ )             | Moderate and above | No                    | 634 | April 21, 2020 <sup>β</sup>    | 13.3%                                                                                                                 |
| (Matzopoulos et al., 2022)   | AHRI panel | 7,139 <sup>◇</sup>  | Depression                      | PHQ-9 ( $\geq 10$ )            | Moderate and above | No                    | 278 | March 31, 2021 <sup>β</sup>    | 30.0%                                                                                                                 |
| (McGinty et al., 2020a)      | AmeriSpeak | 1,337 <sup>◇</sup>  | Psychological distress          | Kessler-6 ( $\geq 13$ )        | Severe and above   | No                    | 153 | July 22, 2020 <sup>χ</sup>     | April 2020: 14.2%, July 2020: 13.6%                                                                                   |
| (McGinty et al., 2020b)      | AmeriSpeak | 1,468 <sup>◇</sup>  | Psychological distress          | Kessler-6 ( $\geq 13$ )        | Severe and above   | No                    | 85  | April 13, 2020 <sup>β</sup>    | 13.6%                                                                                                                 |
| (McGinty et al., 2022)       | AmeriSpeak | 1,068 <sup>◇</sup>  | Psychological distress          | Kessler-6 ( $\geq 13$ )        | Severe and above   | No                    | 420 | November 30, 2020 <sup>χ</sup> | July 2020: 12%, November 2020: 15%                                                                                    |
| (McKnight-Eily et al., 2021) | Lucid      | 1,004*              | Current depression              | PHQ-8 ( $\geq 10$ )            | Moderate and above | No                    | 276 | May 5, 2020 <sup>β</sup>       | 28.6%                                                                                                                 |
| (Nagata et al., 2022)        | HPS        | 69,944 <sup>◇</sup> | Depressive symptoms             | PHQ-4 ( $\geq 3$ on either the | Mild and above     | Depression or anxiety | 191 | December 21, 2020 <sup>β</sup> | 39.1%                                                                                                                 |

|                          |                       |                      |                                 | GAD-2 or PHQ-2) |                    |                       |     |                                |                                                                                                                                                                                                                |
|--------------------------|-----------------------|----------------------|---------------------------------|-----------------|--------------------|-----------------------|-----|--------------------------------|----------------------------------------------------------------------------------------------------------------------------------------------------------------------------------------------------------------|
| (Nguyen et al., 2022)    | HPS                   | 77,104 <sup>◊</sup>  | Depression                      | PHQ-2 (≥3)      | Moderate and above | No                    | 247 | March 29, 2021 <sup>β</sup>    | 24.7%                                                                                                                                                                                                          |
| (Park and Kim, 2021)     | HPS                   | 398,413 <sup>◊</sup> | Depression symptoms             | PHQ-2 (≥3)      | Moderate and above | No                    | 192 | June 30, 2020 <sup>α</sup>     | Late April/early May 5: 24.5%, early-mid May: 25.6%, mid-May: 25.6%, mid-late May: 25.6%, late May/early June: 26.8%, early June: 27.3%; early-mid June: 26.1%, mid-June: 27.2%, late June: 28.7% <sup>ϕ</sup> |
| (Park et al., 2022)      | HPS                   | 585,073 <sup>◊</sup> | Major Depression Disorder (MDD) | PHQ-2 (≥3)      | Moderate and above | No                    | 84  | December 30, 2020 <sup>β</sup> | April 2020: 24.5%, June 2020: 28.7%                                                                                                                                                                            |
| (Riehm et al., 2021)     | UAS                   | 6,901 <sup>◊</sup>   | Mental distress                 | PHQ-4 (≥3)      | Mild and above     | Depression or anxiety | 188 | August 4, 2020 <sup>β</sup>    | 26.1%                                                                                                                                                                                                          |
| (Rosenberg et al., 2021) | Ipsos Knowledge Panel | 1,010 <sup>◊</sup>   | Depression                      | CES-D-10 (≥10)  | Mild and above     | No                    | 257 | April 20, 2020 <sup>β</sup>    | 31.7%                                                                                                                                                                                                          |

|                            |                         |                        |                        |                         |                    |                                                                            |     |                                 |                                                              |
|----------------------------|-------------------------|------------------------|------------------------|-------------------------|--------------------|----------------------------------------------------------------------------|-----|---------------------------------|--------------------------------------------------------------|
| (Samuels et al., 2021)     | Qualtrics panel         | 2,117*                 | Depressive symptoms    | PHQ-2 ( $\geq 3$ )      | Moderate and above | No                                                                         | 387 | September 30, 2020 <sup>β</sup> | 33.6% <sup>φ</sup>                                           |
| (Shen et al., 2022)        | Prolific Academic panel | 503 <sup>⊗</sup>       | Depressive symptoms    | Did not state           | Did not state      | No                                                                         | 340 | February 13, 2021 <sup>β</sup>  | 24.0% <sup>φ</sup>                                           |
| (Shi et al., 2022)         | AmeriSpeak              | 2,079 <sup>◇</sup>     | Psychological distress | Kessler-6 ( $\geq 13$ ) | Severe and above   | No                                                                         | 527 | October 31, 2020 <sup>β</sup>   | 16.0%                                                        |
| (Sundermeir et al., 2021)  | Dynata panel            | 8,355 <sup>◇</sup>     | Depression             | PHQ-2 ( $\geq 3$ )      | Moderate and above | No                                                                         | 259 | December 23, 2020 <sup>β</sup>  | 27.7%                                                        |
| (Tham et al., 2021)        | AmeriSpeak              | 11,480 <sup>◇</sup>    | Mental distress        | Original, did not state | Moderate and above | Mental distress: depressed, anxious, hopeful, lonely, pounding heart, etc. | 542 | June 8, 2020 <sup>α</sup>       | 40.0%                                                        |
| (Thomeer et al., 2022)     | HPS                     | 1,677,238 <sup>◇</sup> | Depressive symptoms    | PHQ-2 ( $\geq 3$ )      | Moderate and above | No                                                                         | 317 | April 26, 2021 <sup>α</sup>     | 25.0%                                                        |
| (Twenge and Joiner, 2020a) | Lucid                   | 2,032 <sup>◇</sup>     | Mental distress        | Kessler-6 ( $\geq 13$ ) | Severe and above   | No                                                                         | 165 | April 27, 2020 <sup>β</sup>     | 27.7%                                                        |
| (Twenge and Joiner, 2020b) | HPS                     | 69,316 <sup>◇</sup>    | Depressive symptoms    | PHQ-2 ( $\geq 3$ )      | Moderate and above | No                                                                         | 50  | May 26, 2020 <sup>α</sup>       | Late April/early May 2020: 23.5%, early-mid May 2020: 24.1%; |

|                       |                         |                        |                                    |                        |                    |                                 |     |                                 |                                                                                             |
|-----------------------|-------------------------|------------------------|------------------------------------|------------------------|--------------------|---------------------------------|-----|---------------------------------|---------------------------------------------------------------------------------------------|
|                       |                         |                        |                                    |                        |                    |                                 |     |                                 | mid May:<br>24.4% late<br>May 2020:<br>24.9%                                                |
| (Twenge et al., 2021) | HPS                     | 317,086 <sup>o</sup>   | Depressive symptoms                | PHQ-2 ( $\geq 3$ )     | Moderate and above | No                              | 298 | September 28, 2020 <sup>a</sup> | Spring 2020: 24.24%, early summer 2020: 25.45%, late summer 2020: 28.04%, fall 2020: 24.66% |
| (Vahratian, 2021)     | HPS                     | 431,656 <sup>o</sup>   | Depressive disorder                | PHQ-2 ( $\geq 3$ )     | Moderate and above | No                              | 102 | December 21, 2020 <sup>a</sup>  | August 2020: 24.5%, December 2020: 30.2%                                                    |
| (Warren et al., 2021) | Qualtrics panel         | 5,023 <sup>o</sup>     | Major depressive disorder symptoms | PHQ-8 ( $\geq 10$ )    | Moderate and above | No                              | 227 | July 5, 2020 <sup>b</sup>       | 15.1% <sup>c</sup>                                                                          |
| (Weaver et al., 2021) | Prolific Academic panel | 362 <sup>o</sup>       | Depression symptoms                | CES-D-10 ( $\geq 10$ ) | Mild and above     | No                              | 240 | May 6, 2020 <sup>b</sup>        | 58.0% <sup>c</sup>                                                                          |
| (Wilson et al., 2021) | Qualtrics panel         | 848 <sup>o</sup>       | Depressive symptoms                | PHQ-8 ( $\geq 10$ )    | Moderate and above | No                              | 248 | April 5, 2020 <sup>b</sup>      | 23.5% <sup>c</sup>                                                                          |
| (Zhang et al., 2021)  | HPS                     | 1,653,180 <sup>o</sup> | Depression                         | PHQ-2 ( $\geq 3$ )     | Moderate and above | No                              | 214 | December 21, 2020 <sup>a</sup>  | 26.57%                                                                                      |
| (Zhou et al., 2020)   | Qualtrics panel         | 1021 <sup>o</sup>      | Depression                         | DASS-21 ( $\geq 14$ )  | Moderate and above | Depression, anxiety, and stress | 101 | May 22, 2020 <sup>a</sup>       | April 2020: 47.4%; early May 2020: 41.2%; late                                              |

|  |  |  |  |  |  |  |  |  |  |                                 |
|--|--|--|--|--|--|--|--|--|--|---------------------------------|
|  |  |  |  |  |  |  |  |  |  | May 2020:<br>36.2% <sup>§</sup> |
|--|--|--|--|--|--|--|--|--|--|---------------------------------|

Note: Prevalence points weighted by article authors unless otherwise noted. HPS: Household Pulse Survey; UAS: Understanding America Study; NAS: U.S. National Alcohol Survey; AHRI Panel: Acumen Health Research Institute; CES-D-10: 10-item Centre for Epidemiological Studies Depression Scale; CES-D-8: 8-item Centre for Epidemiological Studies Depression Scale; DASS-21: The Depression, Anxiety and Stress Scale - 21 Items; PHQ-1: Patient Health Questionnaire 1, PHQ-2: Patient Health Questionnaire 2; PHQ-4: Patient Health Questionnaire 4; PHQ-8: Patient Health Questionnaire 8; PHQ-9: Patient Health Questionnaire 9.



## References

- Antony, M.M., Bieling, P.J., Cox, B.J., Enns, M.W., Swinson, R.P., 1998. Psychometric properties of the 42-item and 21-item versions of the Depression Anxiety Stress Scales in clinical groups and a community sample. *Psychol. Assess.* 10, 176–181. <https://doi.org/10.1037/1040-3590.10.2.176>
- Berkowitz, S.A., Basu, S., 2021. Unmet Social Needs And Worse Mental Health After Expiration Of COVID-19 Federal Pandemic Unemployment Compensation: Study examines unmet social needs and mental health after Federal Pandemic Unemployment Compensation expired. *Health Aff. (Millwood)* 40, 426–434. <https://doi.org/10.1377/hlthaff.2020.01990>
- Birditt, K.S., Turkelson, A., Fingerman, K.L., Polenick, C.A., Oya, A., 2021. Age Differences in Stress, Life Changes, and Social Ties During the COVID-19 Pandemic: Implications for Psychological Well-Being. *The Gerontologist* 61, 205–216. <https://doi.org/10.1093/geront/gnaa204>
- Breslau, J., Finucane, M.L., Locker, A.R., Baird, M.D., Roth, E.A., Collins, R.L., 2021. A longitudinal study of psychological distress in the United States before and during the COVID-19 pandemic. *Prev. Med.* 143, 106362. <https://doi.org/10.1016/j.ypmed.2020.106362>
- Breslau, J., North, C.S., Finucane, M.L., Roth, E., Collins, R.L., 2022. Perceived Need for Mental Health Treatment and the Mental Health Response to the COVID-19 Pandemic in the United States. *Psychiatry* 85, 1–12. <https://doi.org/10.1080/00332747.2021.1940470>
- Bryan, C.J., Bryan, A.O., Baker, J.C., 2020. Associations among state-level physical distancing measures and suicidal thoughts and behaviors among U.S. adults during the early COVID-19 pandemic. *Suicide Life. Threat. Behav.* 50, 1223–1229. <https://doi.org/10.1111/sltb.12653>
- Cai, C., Woolhandler, S., Himmelstein, D.U., Gaffney, A., 2021. Trends in Anxiety and Depression Symptoms During the COVID-19 Pandemic: Results from the US Census Bureau’s Household Pulse Survey. *J. Gen. Intern. Med.* 36, 1841–1843. <https://doi.org/10.1007/s11606-021-06759-9>
- Chen, S., Aruldass, A.R., Cardinal, R.N., 2022. Mental health outcomes after SARS-CoV-2 vaccination in the United States: A national cross-sectional study. *J. Affect. Disord.* 298, 396–399. <https://doi.org/10.1016/j.jad.2021.10.134>
- Czeisler, M.É., 2020. Mental Health, Substance Use, and Suicidal Ideation During the COVID-19 Pandemic — United States, June 24–30, 2020. *MMWR Morb. Mortal. Wkly. Rep.* 69. <https://doi.org/10.15585/mmwr.mm6932a1>
- Czeisler, M.É., Howard, M.E., Robbins, R., Barger, L.K., Facer-Childs, E.R., Rajaratnam, S.M.W., Czeisler, C.A., 2021a. Early public adherence with and support for stay-at-home COVID-19 mitigation strategies despite adverse life impact: a transnational cross-sectional survey study in the United States and Australia. *BMC Public Health* 21, 503. <https://doi.org/10.1186/s12889-021-10410-x>
- Czeisler, M.É., Lane, R.I., Wiley, J.F., Czeisler, C.A., Howard, M.E., Rajaratnam, S.M.W., 2021b. Follow-up Survey of US Adult Reports of Mental Health, Substance Use, and Suicidal

- Ideation During the COVID-19 Pandemic, September 2020. *JAMA Netw. Open* 4, e2037665. <https://doi.org/10.1001/jamanetworkopen.2020.37665>
- Daly, M., Sutin, A.R., Robinson, E., 2021. Depression reported by US adults in 2017–2018 and March and April 2020. *J. Affect. Disord.* 278, 131–135. <https://doi.org/10.1016/j.jad.2020.09.065>
- Donnelly, R., Farina, M.P., 2021. How do state policies shape experiences of household income shocks and mental health during the COVID-19 pandemic? *Soc. Sci. Med.* 269, 113557. <https://doi.org/10.1016/j.socscimed.2020.113557>
- Ettman, C.K., Abdalla, S.M., Cohen, G.H., Sampson, L., Vivier, P.M., Galea, S., 2021. Low assets and financial stressors associated with higher depression during COVID-19 in a nationally representative sample of US adults. *J. Epidemiol. Community Health* 75, 501–508. <https://doi.org/10.1136/jech-2020-215213>
- Ettman, C.K., Abdalla, S.M., Cohen, G.H., Sampson, L., Vivier, P.M., Galea, S., 2020. Prevalence of Depression Symptoms in US Adults Before and During the COVID-19 Pandemic. *JAMA Netw. Open* 3, e2019686. <https://doi.org/10.1001/jamanetworkopen.2020.19686>
- Holingue, C., Kalb, L.G., Riehm, K.E., Bennett, D., Kapteyn, A., Veldhuis, C.B., Johnson, R.M., Fallin, M.D., Kreuter, F., Stuart, E.A., Thrul, J., 2020. Mental Distress in the United States at the Beginning of the COVID-19 Pandemic. *Am. J. Public Health* 110, 1628–1634. <https://doi.org/10.2105/AJPH.2020.305857>
- Kämpfen, F., Kohler, I.V., Ciancio, A., Bruine de Bruin, W., Maurer, J., Kohler, H.-P., 2020. Predictors of mental health during the Covid-19 pandemic in the US: Role of economic concerns, health worries and social distancing. *PLOS ONE* 15, e0241895. <https://doi.org/10.1371/journal.pone.0241895>
- Kantor, B.N., Kantor, J., 2020. Mental Health Outcomes and Associations During the COVID-19 Pandemic: A Cross-Sectional Population-Based Study in the United States. *Front. Psychiatry* 11, 569083. <https://doi.org/10.3389/fpsy.2020.569083>
- Kim, D., 2021. Financial hardship and social assistance as determinants of mental health and food and housing insecurity during the COVID-19 pandemic in the United States. *SSM - Popul. Health* 16, 100862. <https://doi.org/10.1016/j.ssmph.2021.100862>
- Kroenke, K., Spitzer, R.L., Williams, J.B.W., 2003. The Patient Health Questionnaire-2: Validity of a Two-Item Depression Screener. *Med. Care* 41, 1284–1292. <https://doi.org/10.1097/01.MLR.0000093487.78664.3C>
- Kroenke, K., Spitzer, R.L., Williams, J.B.W., 2001. The PHQ-9: validity of a brief depression severity measure. *J. Gen. Intern. Med.* 16, 606–613. <https://doi.org/10.1046/j.1525-1497.2001.016009606.x>
- Kroenke, K., Spitzer, R.L., Williams, J.B.W., Lowe, B., 2009. An Ultra-Brief Screening Scale for Anxiety and Depression: The PHQ-4. *Psychosomatics* 50, 613–621. <https://doi.org/10.1176/appi.psy.50.6.613>
- Lee, H., Singh, G.K., 2021. Monthly trends in self-reported health status and depression by race/ethnicity and socioeconomic status during the COVID-19 Pandemic, United States, April 2020 – May 2021. *Ann. Epidemiol.* 63, 52–62. <https://doi.org/10.1016/j.annepidem.2021.07.014>

- Lee, J.O., Kapteyn, A., Clomax, A., Jin, H., 2021. Estimating influences of unemployment and underemployment on mental health during the COVID-19 pandemic: who suffers the most? *Public Health* 201, 48–54. <https://doi.org/10.1016/j.puhe.2021.09.038>
- Linton, S.L., Leifheit, K.M., McGinty, E.E., Barry, C.L., Pollack, C.E., 2021. Association Between Housing Insecurity, Psychological Distress, and Self-rated Health Among US Adults During the COVID-19 Pandemic. *JAMA Netw. Open* 4, e2127772. <https://doi.org/10.1001/jamanetworkopen.2021.27772>
- Lueck, J.A., 2021. Help-seeking intentions in the U.S. population during the COVID-19 pandemic: Examining the role of COVID-19 financial hardship, suicide risk, and stigma. *Psychiatry Res.* 303, 114069. <https://doi.org/10.1016/j.psychres.2021.114069>
- MacDonald, J.J., Baxter-King, R., Vavreck, L., Naeim, A., Wenger, N., Sepucha, K., Stanton, A.L., 2022. Depressive Symptoms and Anxiety During the COVID-19 Pandemic: Large, Longitudinal, Cross-sectional Survey. *JMIR Ment. Health* 9, e33585. <https://doi.org/10.2196/33585>
- Martinez, P., Karriker-Jaffe, K.J., Ye, Y., Patterson, D., Greenfield, T.K., Mulia, N., Kerr, W.C., 2022. Mental health and drinking to cope in the early COVID period: Data from the 2019–2020 US National Alcohol Survey. *Addict. Behav.* 128, 107247. <https://doi.org/10.1016/j.addbeh.2022.107247>
- Matzopoulos, R., Morlock, R., Morlock, A., Lerer, B., Lerer, L., 2022. Psychedelic Mushrooms in the USA: Knowledge, Patterns of Use, and Association With Health Outcomes. *Front. Psychiatry* 12, 780696. <https://doi.org/10.3389/fpsy.2021.780696>
- McGinty, E.E., Presskreischer, R., Anderson, K.E., Han, H., Barry, C.L., 2020a. Psychological Distress and COVID-19–Related Stressors Reported in a Longitudinal Cohort of US Adults in April and July 2020. *JAMA*. <https://doi.org/10.1001/jama.2020.21231>
- McGinty, E.E., Presskreischer, R., Han, H., Barry, C.L., 2022. Trends in Psychological Distress Among US Adults During Different Phases of the COVID-19 Pandemic. *JAMA Netw. Open* 5, e2144776. <https://doi.org/10.1001/jamanetworkopen.2021.44776>
- McGinty, E.E., Presskreischer, R., Han, H., Barry, C.L., 2020b. Psychological Distress and Loneliness Reported by US Adults in 2018 and April 2020. *JAMA* 324, 93. <https://doi.org/10.1001/jama.2020.9740>
- McKnight-Eily, L.R., Okoro, C.A., Strine, T.W., Verlenden, J., Hollis, N.D., Njai, R., Mitchell, E.W., Board, A., Puddy, R., Thomas, C., 2021. Racial and Ethnic Disparities in the Prevalence of Stress and Worry, Mental Health Conditions, and Increased Substance Use Among Adults During the COVID-19 Pandemic — United States, April and May 2020. *MMWR Morb. Mortal. Wkly. Rep.* 70, 162–166. <https://doi.org/10.15585/mmwr.mm7005a3>
- Nagata, J.M., Ganson, K.T., Bonin, S.L., Twadell, K.L., Garcia, M.E., Langrock, O., Vittinghoff, E., Tsai, A.C., Weiser, S.D., Abdel Magid, H.S., 2022. Prevalence and Sociodemographic Correlates of Unmet Need for Mental Health Counseling Among Adults During the COVID-19 Pandemic. *Psychiatr. Serv.* 73, 206–209. <https://doi.org/10.1176/appi.ps.202100111>

- Nguyen, K.H., Chen, S., Morris, K., Chui, K., Allen, J.D., 2022. Mental health symptoms and association with COVID-19 vaccination receipt and intention to vaccinate among adults, United States. *Prev. Med.* 154, 106905. <https://doi.org/10.1016/j.ypmed.2021.106905>
- Park, J., Choi, J., Kim, B., 2022. COVID-19 pandemic and mental health problems of adults in United States: mediating roles of cognitive concerns and behavioral changes. *Soc. Psychiatry Psychiatr. Epidemiol.* 57, 1557–1570. <https://doi.org/10.1007/s00127-022-02265-3>
- Park, J., Kim, B., 2021. Associations of Small Business Closure and Reduced Urban Mobility with Mental Health Problems in COVID-19 Pandemic: a National Representative Sample Study. *J. Urban Health* 98, 13–26. <https://doi.org/10.1007/s11524-020-00511-0>
- Riehm, K.E., Hologue, C., Smail, E.J., Kapteyn, A., Bennett, D., Thrul, J., Kreuter, F., McGinty, E.E., Kalb, L.G., Veldhuis, C.B., Johnson, R.M., Fallin, M.D., Stuart, E.A., 2021. Trajectories of Mental Distress Among U.S. Adults During the COVID-19 Pandemic. *Ann. Behav. Med.* 55, 93–102. <https://doi.org/10.1093/abm/kaaa126>
- Rosenberg, M., Luetke, M., Hensel, D., Kianersi, S., Fu, T., Herbenick, D., 2021. Depression and loneliness during April 2020 COVID-19 restrictions in the United States, and their associations with frequency of social and sexual connections. *Soc. Psychiatry Psychiatr. Epidemiol.* 56, 1221–1232. <https://doi.org/10.1007/s00127-020-02002-8>
- Samuels, J., Hologue, C., Nestadt, P.S., Bienvenu, O.J., Phan, P., Nestadt, G., 2021. An investigation of COVID-19 related worry in a United States population sample. *J. Psychiatr. Res.* 144, 360–368. <https://doi.org/10.1016/j.jpsychires.2021.10.036>
- Shen, X., MacDonald, M., Logan, S.W., Parkinson, C., Gorrell, L., Hatfield, B.E., 2022. Leisure Engagement during COVID-19 and Its Association with Mental Health and Wellbeing in U.S. Adults. *Int. J. Environ. Res. Public Health* 19, 1081. <https://doi.org/10.3390/ijerph19031081>
- Shi, L., Zhang, D., Martin, E., Chen, Z., Li, H., Han, X., Wen, M., Chen, L., Li, Y., Li, J., Chen, B., Ramos, A.K., King, K.M., Michaud, T., Su, D., 2022. Racial Discrimination, Mental Health and Behavioral Health During the COVID-19 Pandemic: a National Survey in the United States. *J. Gen. Intern. Med.* 37, 2496–2504. <https://doi.org/10.1007/s11606-022-07540-2>
- Sundermeir, S.M., Wolfson, J.A., Bertoldo, J., Gibson, D.G., Agarwal, S., Labrique, A.B., 2021. Food insecurity is adversely associated with psychological distress, anxiety and depression during the COVID-19 pandemic. *Prev. Med. Rep.* 24, 101547. <https://doi.org/10.1016/j.pmedr.2021.101547>
- Tham, W.W., Sojli, E., Bryant, R., McAleer, M., 2021. Common Mental Disorders and Economic Uncertainty: Evidence from the COVID-19 Pandemic in the U.S. *PLOS ONE* 16, e0260726. <https://doi.org/10.1371/journal.pone.0260726>
- Thomeer, M.B., Moody, M.D., Yahirun, J., 2022. Racial and Ethnic Disparities in Mental Health and Mental Health Care During The COVID-19 Pandemic. *J. Racial Ethn. Health Disparities.* <https://doi.org/10.1007/s40615-022-01284-9>
- Twenge, J.M., Joiner, T.E., 2020a. Mental distress among U.S. adults during the COVID-19 pandemic. *J. Clin. Psychol.* 76, 2170–2182. <https://doi.org/10.1002/jclp.23064>

- Twenge, J.M., Joiner, T.E., 2020b. U.S. Census Bureau-assessed prevalence of anxiety and depressive symptoms in 2019 and during the 2020 COVID-19 pandemic. *Depress. Anxiety* 37, 954–956. <https://doi.org/10.1002/da.23077>
- Twenge, J.M., McAllister, C., Joiner, T.E., 2021. Anxiety and depressive symptoms in U.S. Census Bureau assessments of adults: Trends from 2019 to fall 2020 across demographic groups. *J. Anxiety Disord.* 83, 102455. <https://doi.org/10.1016/j.janxdis.2021.102455>
- Vahratian, A., 2021. Symptoms of Anxiety or Depressive Disorder and Use of Mental Health Care Among Adults During the COVID-19 Pandemic — United States, August 2020–February 2021. *MMWR Morb. Mortal. Wkly. Rep.* 70. <https://doi.org/10.15585/mmwr.mm7013e2>
- Warren, A.M., Zolfaghari, K., Fresnedo, M., Bennett, M., Pogue, J., Waddimba, A., Zvolensky, M., Carlbring, P., Powers, M.B., 2021. Anxiety sensitivity, COVID-19 fear, and mental health: results from a United States population sample. *Cogn. Behav. Ther.* 50, 204–216. <https://doi.org/10.1080/16506073.2021.1874505>
- Weaver, R.H., Jackson, A., Lanigan, J., Power, T.G., Anderson, A., Cox, A.E., Eddy, L., Parker, L., Sano, Y., Weybright, E., 2021. Health Behaviors at the Onset of the COVID-19 Pandemic. *Am. J. Health Behav.* 45, 44–61. <https://doi.org/10.5993/AJHB.45.1.4>
- Wilson, J.M., Lee, J., Shook, N.J., 2021. COVID-19 worries and mental health: the moderating effect of age. *Aging Ment. Health* 25, 1289–1296. <https://doi.org/10.1080/13607863.2020.1856778>
- Zhang, W., Walkover, M., Wu, Y.Y., 2021. The challenge of COVID-19 for adult men and women in the United States: disparities of psychological distress by gender and age. *Public Health* 198, 218–222. <https://doi.org/10.1016/j.puhe.2021.07.017>
- Zhou, Y., MacGeorge, E.L., Myrick, J.G., 2020. Mental Health and Its Predictors during the Early Months of the COVID-19 Pandemic Experience in the United States. *Int. J. Environ. Res. Public. Health* 17, 6315. <https://doi.org/10.3390/ijerph17176315>
